# Supplementary material
Source: PubMed Central journal article supplement (PMC4428397)
Supplement: mt2014113x3.pdf [file mt2014113x3.pdf]

| Table S1: Number of animals included in the different experimental groups or excluded because died or because cerebral blood flow (CBF) did not reach values less than 70 % compared to pre-stroke condition. |                                     |                                 |                                    |                                              |                                               |                                               |                               |                                  |
|---------------------------------------------------------------------------------------------------------------------------------------------------------------------------------------------------------------|-------------------------------------|---------------------------------|------------------------------------|----------------------------------------------|-----------------------------------------------|-----------------------------------------------|-------------------------------|----------------------------------|
|                                                                                                                                                                                                               | Group 1<br>Sham operated<br>animals | Group 2<br>Neg Control<br>tMCAo | Group 3<br>Anti-miR-103-1<br>tMCAo | Group 4<br>tMCAo +<br>6 hours<br>Reperfusion | Group 5<br>tMCAo +<br>24 hours<br>Reperfusion | Group 6<br>tMCAo +<br>72 hours<br>Reperfusion | Group 7<br>tMCAo +<br>Vehicle | Group 8<br>Anti-miR-107<br>tMCAo |
| Animals died                                                                                                                                                                                                  | 0                                   | 3                               | 1                                  | 0                                            | 0                                             | 1                                             | 0                             | 0                                |
| Animals<br>excluded<br>(CBF $\leq$ 70%)                                                                                                                                                                       | 0                                   | 7                               | 7                                  | 2                                            | 2                                             | 1                                             | 2                             | 1                                |
| Animals used<br>for statistical<br>analysis                                                                                                                                                                   | 8                                   | 21                              | 25                                 | 3                                            | 5                                             | 4                                             | 6                             | 4                                |
| Total animals<br>per group                                                                                                                                                                                    | 8                                   | 31                              | 33                                 | 5                                            | 7                                             | 6                                             | 8                             | 5                                |
