# Supplementary material
Source: PubMed Central journal article supplement (PMC4428397)

Figure S1

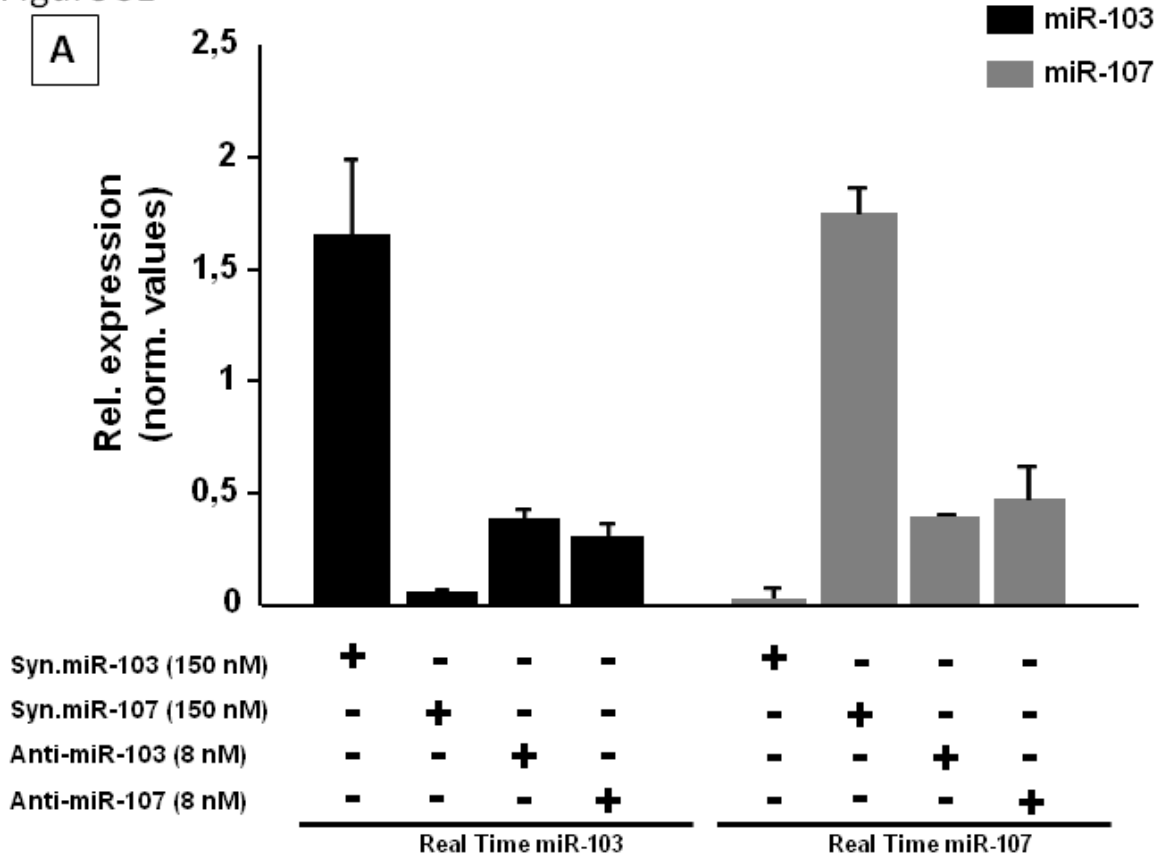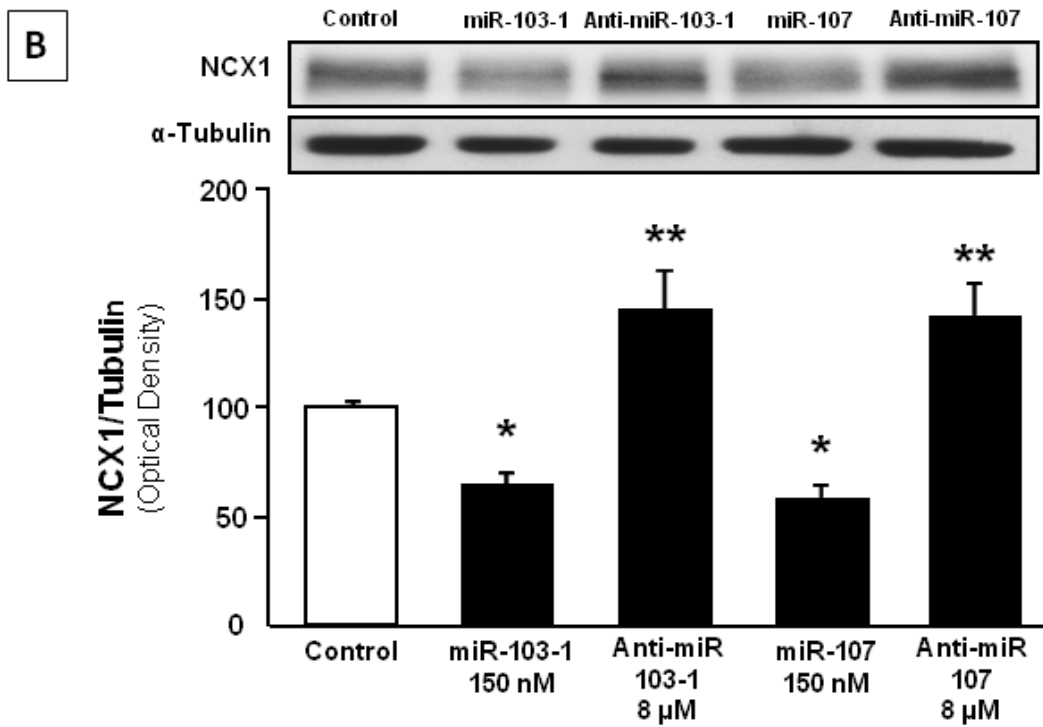

Supplement: mt2014113x1.pdf [file mt2014113x1.pdf]

Figure S2

**A**

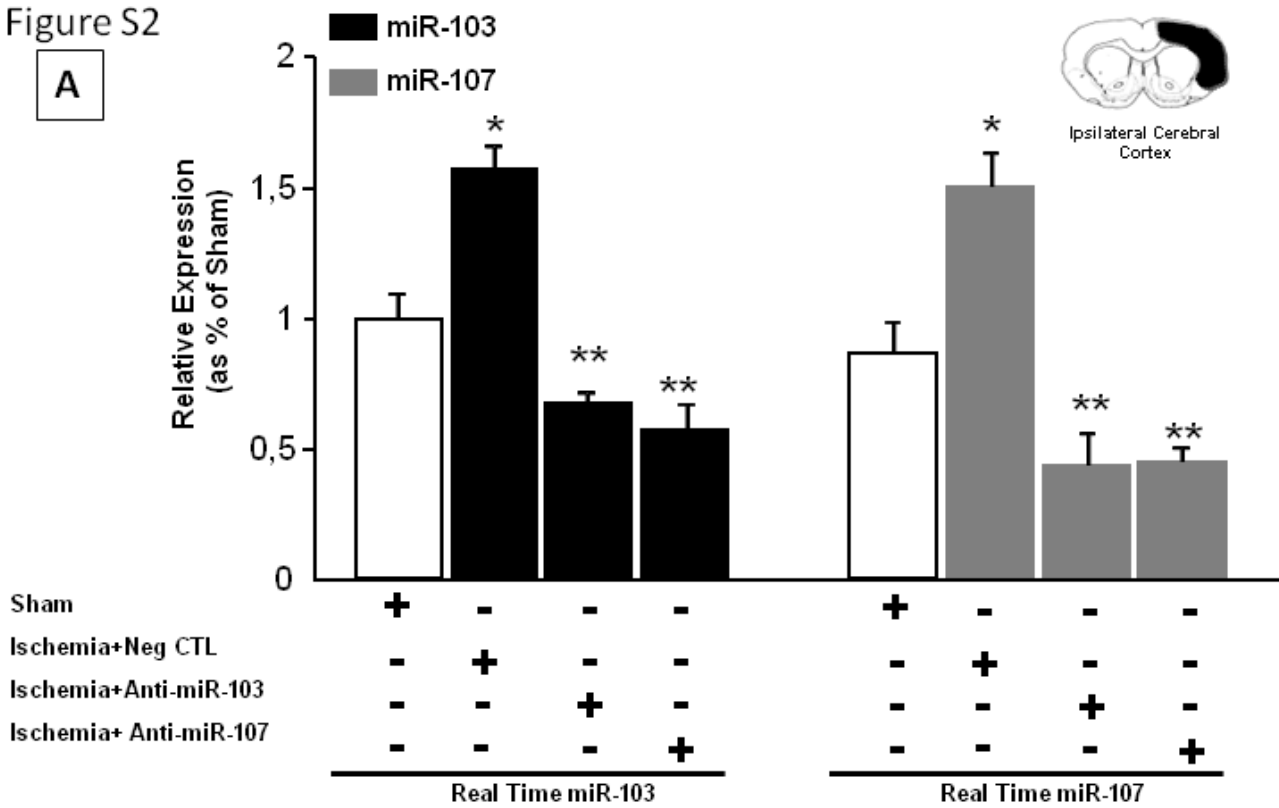

**B**

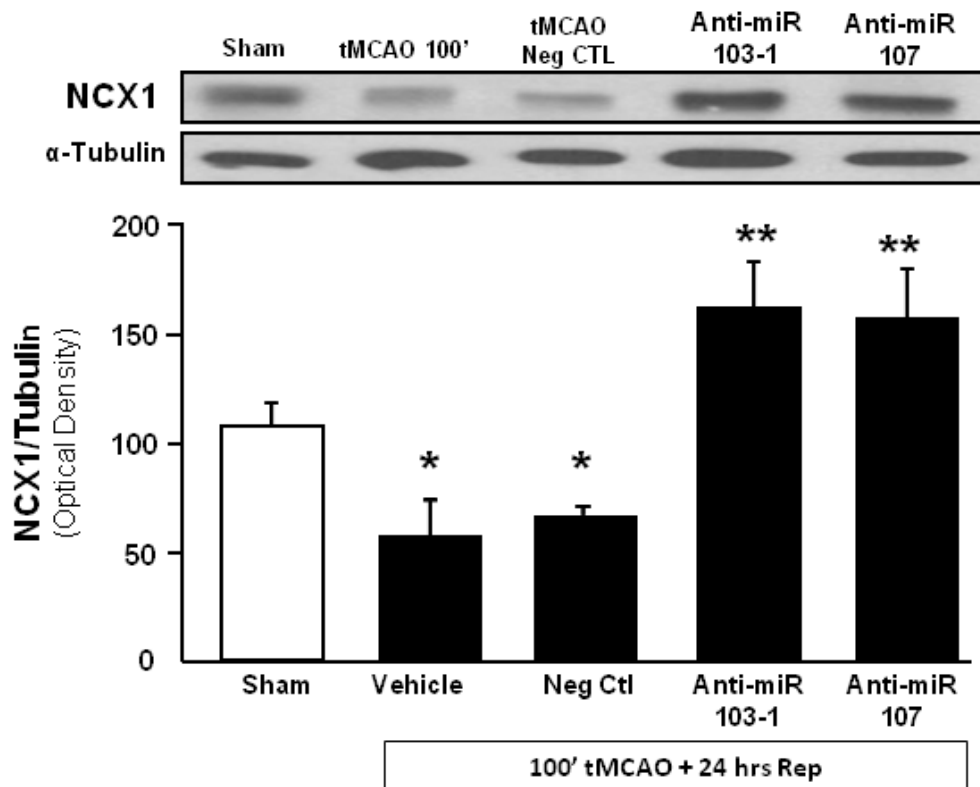

Supplement: mt2014113x2.pdf [file mt2014113x2.pdf]
